# Supplementary material
Source: MDPI journal article supplement (https://www.mdpi.com/2076-3417/10/4/1405)
Supplement: s1 [file s1]

# Electrochemical Deposition of Copper on Epitaxial Graphene

Ivan Shteplyuk <sup>1,2,\*</sup>, Mikhail Vagin <sup>1,3</sup> and Rositsa Yakimova <sup>1</sup>

<sup>1</sup> Semiconductor Materials, Department of Physics, Chemistry and Biology-IFM, Linköping University, SE-58183 Linköping, Sweden; mikhail.vagin@liu.se (M.V.); rositsa.yakimova@liu.se (R.Y.)

<sup>2</sup> Frantsevich Institute for Problems of Materials Science, NASU—National Academy of Sciences of Ukraine, 142 Kyiv, Ukraine

<sup>3</sup> Laboratory of Organic Electronics, Department of Science and Technology, Linköping University, SE-60174 Norrköping, Sweden

\* Correspondence: ivan.shteplyuk@liu.se; Tel.: +46-13282528

## Supplementary Materials

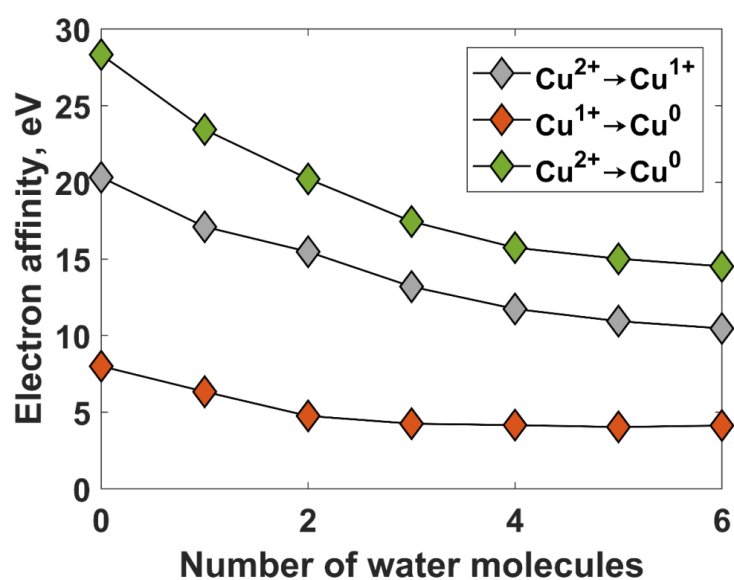

**Figure S1.** The decrease of the computed electron acceptor reactivity with the addition of the water molecules into the aquo complexes.

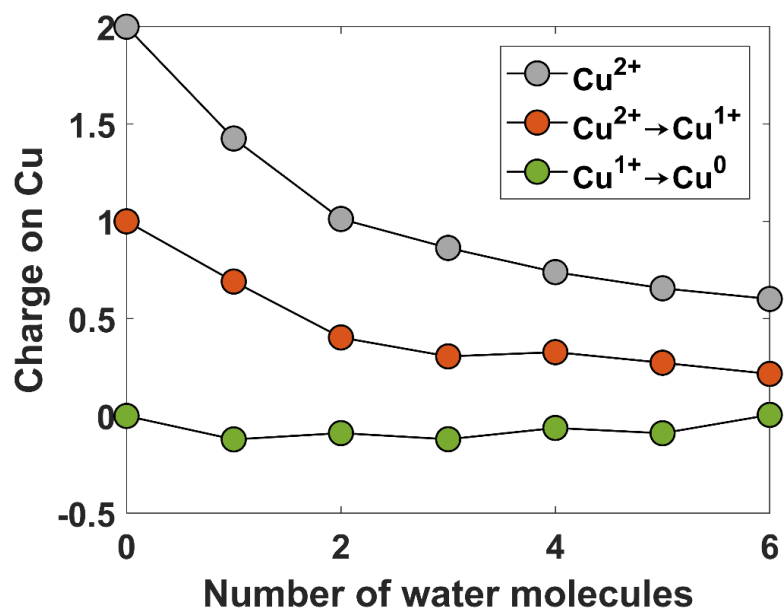

**Figure S2.** The change in Hirshfeld charge on Cu species with the addition of the water molecules into the aquo complexes.
